# Supplementary material
Source: HighWire-hosted journal article supplement (https://jnm.snmjournals.org/highwire/filestream/95395/field_highwire_adjunct_files/0/206730_Supplemental_Data.pdf)
Supplement: 206730_Supplemental_Data.pdf [file 206730_Supplemental_Data.pdf]

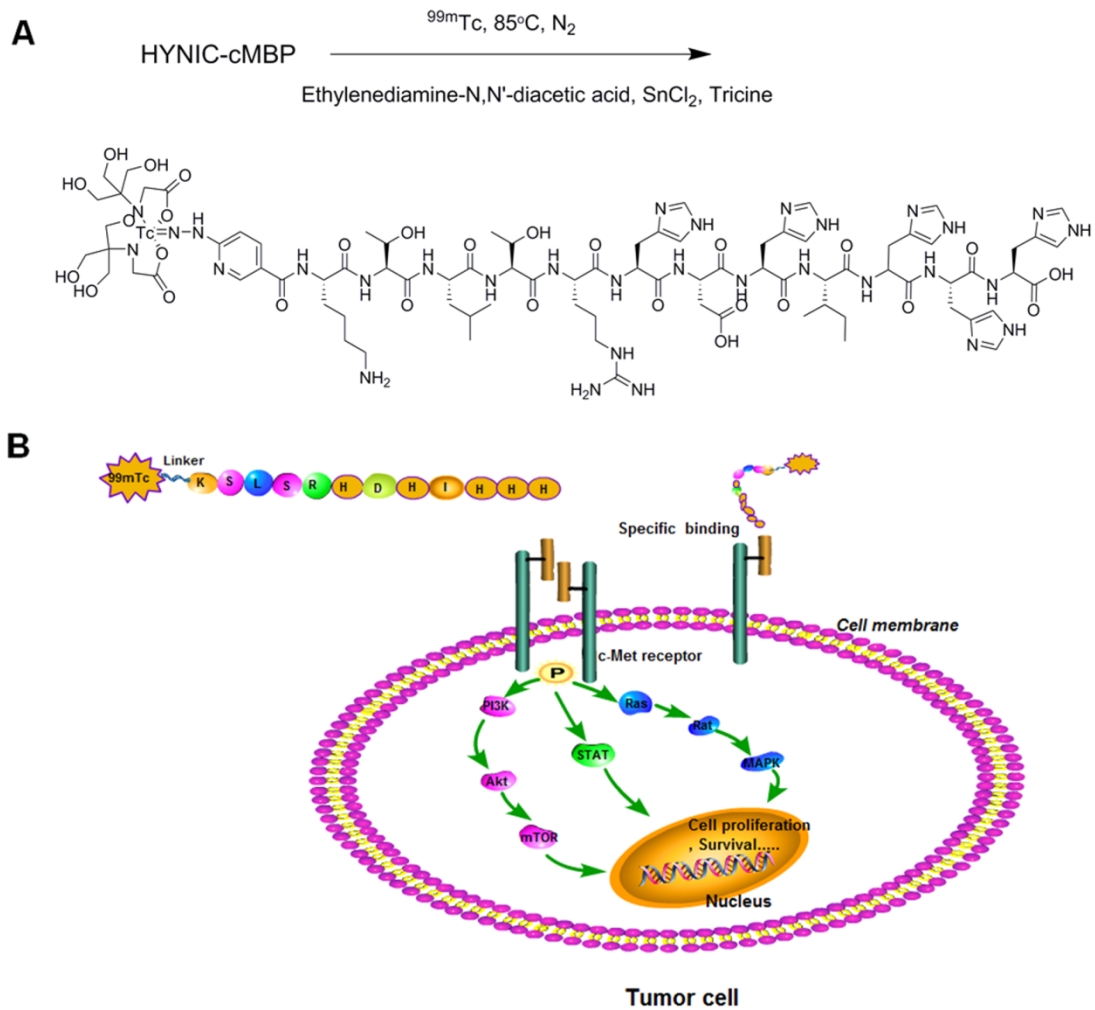

**Supplemental Fig. 1** The schematic diagram illustrates the process of radiochemical synthesis and molecular structure of  $^{99m}\text{Tc}$ -HYNIC-cMBP (A) and the specific binding of the tracer to c-Met receptor (B).

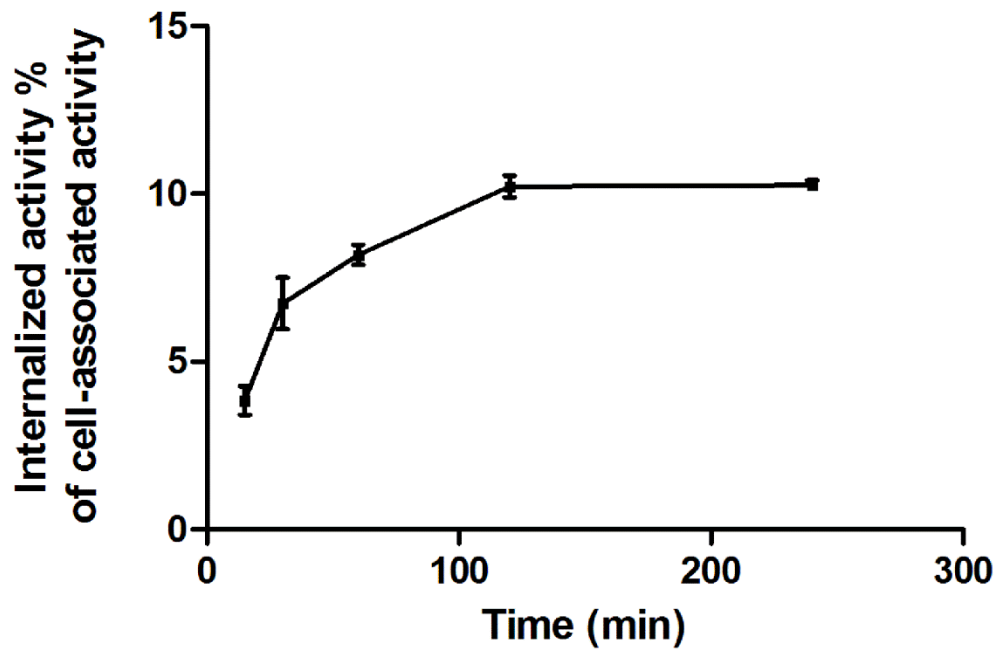

**Supplemental Fig. 2** Percent of internalized activity to cell-associated activity (membrane-bound + internalization).

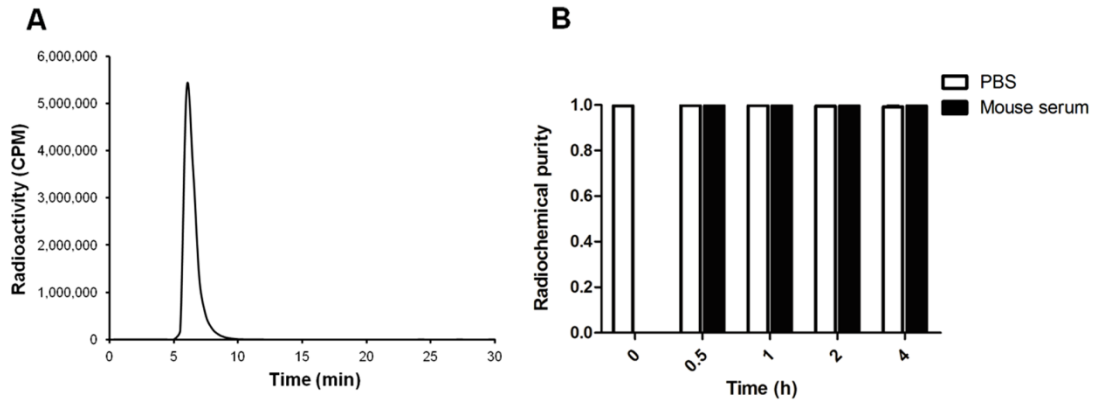

**Supplemental Fig. 3** Radiochemical purity of  $^{99m}\text{Tc}$ -HYNIC-cMBP in PBS at 0 h after the tracer was prepared (A). *In vitro* stability analysis of the intact tracer by detected radiochemical purity of  $^{99m}\text{Tc}$ -HYNIC-cMBP in PBS and (or) mouse serum at 0-4 h after the tracer was prepared (B).

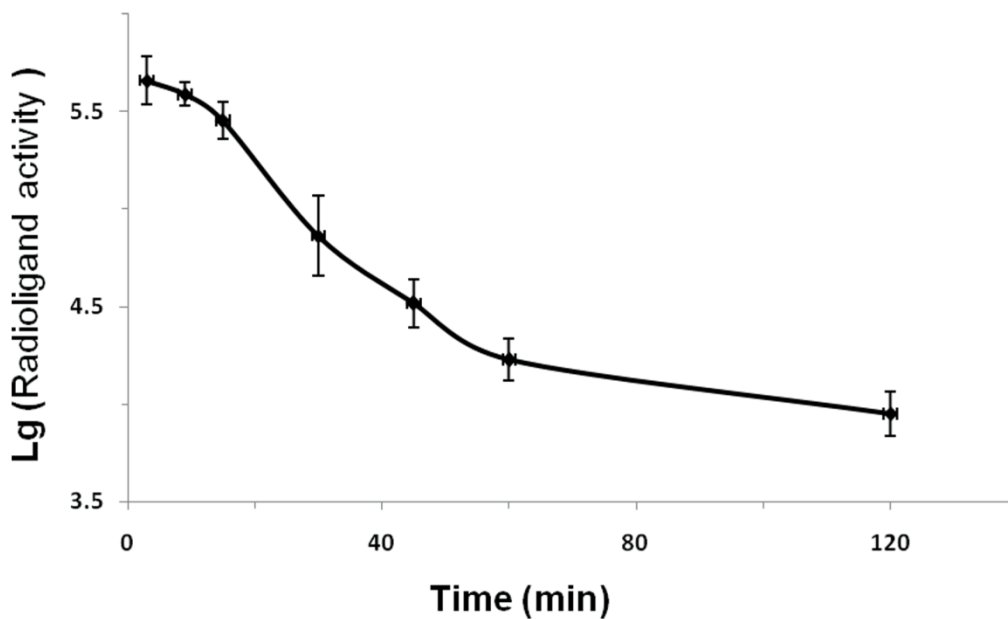

**Supplemental Fig. 4** Representative time-logarithmic value of activity curve of supernatant/plasma at 3, 9, 15, 30, 45, 60 and 120 min after injection of  $^{99m}\text{Tc}$ -HYNIC-cMBP.

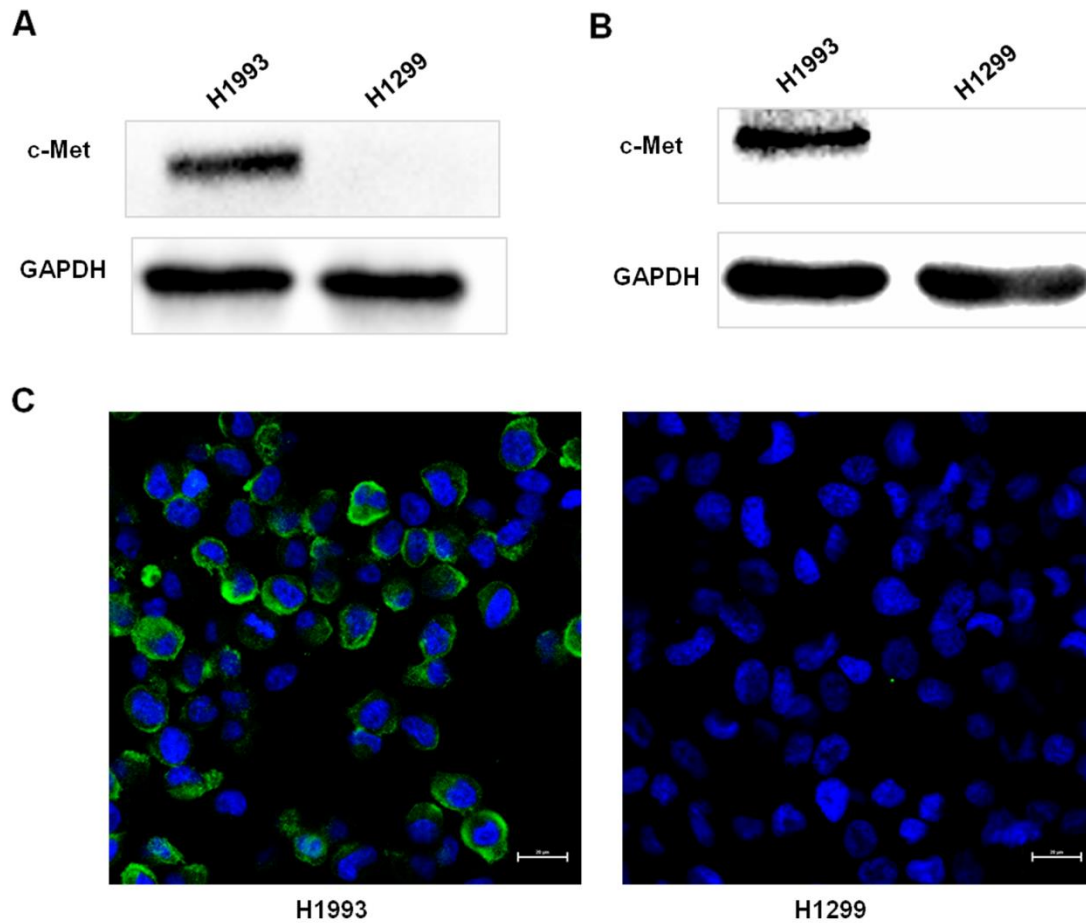

**Supplemental Fig. 5** Western blot analysis of c-Met expression in H1993 and H1299 cell lines (A) and tumor tissues (B). Confocal images of immunofluorescence staining for c-Met expression in H1993 and H1299 cell lines (C).

**Supplemental Table 1:** Biodistribution of  $^{99m}\text{Tc}$ -HYNIC-cMBP in mice bearing H1993 tumors and in blocked H1993 groups at different time points.

| Organ            | 0.5h         |              | 1h           | 2h           | 4h           |
|------------------|--------------|--------------|--------------|--------------|--------------|
|                  | H1993        | H1993-block  |              |              |              |
| <b>brain</b>     | 0.16±0.02    | 0.13±0.03    | 0.11±0.06    | 0.03±0.01    | 0.02±0.00    |
| <b>heart</b>     | 1.59±0.39    | 1.46±0.33    | 0.69±0.11    | 0.20±0.04    | 0.24±0.04    |
| <b>lung</b>      | 3.02±0.41    | 2.75±0.30    | 1.81±0.72    | 0.51±0.13    | 0.20±0.04    |
| <b>liver</b>     | 5.92±0.57    | 5.75±0.95    | 4.92±1.36    | 3.75±1.57    | 2.58±1.52    |
| <b>bone</b>      | 1.67±0.36    | 1.61±0.30    | 0.90±0.18    | 0.29±0.06    | 0.26±0.06    |
| <b>kidney</b>    | 247.55±40.52 | 259.77±29.25 | 225.93±12.61 | 159.21±33.68 | 138.16±25.13 |
| <b>stomach</b>   | 1.25±0.32    | 1.23±0.28    | 0.66±0.10    | 0.28±0.04    | 0.21±0.07    |
| <b>intestine</b> | 1.51±0.35    | 1.43±0.22    | 0.79±0.18    | 0.22±0.07    | 0.18±0.06    |
| <b>blood</b>     | 8.32±2.45    | 7.80±1.25    | 1.99±0.19    | 0.72±0.37    | 0.83±0.08    |
| <b>spleen</b>    | 2.30±0.11    | 2.08±0.52    | 1.76±0.30    | 1.16±0.77    | 1.03±0.18    |
| <b>tumor</b>     | 4.74±1.43    | 1.03±0.43    | 2.84±0.28    | 0.87±0.13    | 0.75±0.14    |
| <b>skin</b>      | 1.40±0.64    | 1.62±0.25    | 0.58±0.05    | 0.37±0.12    | 0.60±0.14    |
| <b>muscle</b>    | 0.70±0.07    | 0.64±0.08    | 0.29±0.04    | 0.06±0.02    | 0.06±0.00    |

Values are mean ± SD and expressed as %ID/g (n=3)

**Supplemental Table 2:** Biodistribution of  $^{99m}\text{Tc}$ -HYNIC-cMBP in mice bearing H1299 tumors at different time points.

| <b>Organ</b>     | <b>0.5h</b>  | <b>1h</b>    | <b>2h</b>    | <b>4h</b>    |
|------------------|--------------|--------------|--------------|--------------|
| <b>brain</b>     | 0.14±0.03    | 0.07±0.003   | 0.03±0.01    | 0.04±0.01    |
| <b>heart</b>     | 1.64±0.33    | 0.21±0.11    | 0.23±0.19    | 0.28±0.15    |
| <b>lung</b>      | 3.26±0.33    | 1.65±0.39    | 0.46±0.29    | 0.32±0.10    |
| <b>liver</b>     | 5.62±1.50    | 5.09±0.83    | 3.53±0.85    | 2.02±0.91    |
| <b>bone</b>      | 1.30±0.49    | 0.57±0.03    | 0.36±0.06    | 0.25±0.03    |
| <b>kidney</b>    | 252.66±44.37 | 207.49±15.19 | 174.14±41.35 | 143.95±50.02 |
| <b>stomach</b>   | 1.13±0.22    | 0.43±0.07    | 0.33±0.05    | 0.28±0.14    |
| <b>intestine</b> | 1.45±0.65    | 0.69±0.31    | 0.21±0.05    | 0.21±0.03    |
| <b>blood</b>     | 7.92±3.84    | 1.61±0.40    | 0.87±0.38    | 0.88±0.28    |
| <b>spleen</b>    | 2.09±0.60    | 1.72±0.26    | 1.13±0.23    | 0.96±0.39    |
| <b>tumor</b>     | 1.00±0.37    | 0.71±0.13    | 0.47±0.17    | 0.46±0.30    |
| <b>skin</b>      | 1.08±0.16    | 0.99±0.24    | 0.52±0.15    | 0.52±0.15    |
| <b>muscle</b>    | 0.57±0.27    | 0.22±0.03    | 0.08±0.03    | 0.06±0.03    |

Values are mean ± SD and expressed as %ID/g (n=3)
